# Supplementary material for: Physiological and transcriptional response to drought stress among bioenergy grass Miscanthus species
Source: Biotechnol Biofuels. 2021 Mar 6;14:60. doi: 10.1186/s13068-021-01915-z (PMC7937229; doi:10.1186/s13068-021-01915-z)
Supplement: Supplementary file 14 — Additional file 14: Table S11. Candidate genes in the starch and sucrose pathways highlighted by our analysis. [file 13068_2021_1915_MOESM14_ESM.xlsx]

## Sheet: Sheet1
genes_uniq	Msac_FC	Msin_FC	Mxg_FC	H3n_FC	Msin desc	EC	Ath_ID	Ath genename	Ath desc	Ath regulation	Ath-uniprot	Ath-uniprot-gename	Ath-uniprot-desc	Rice_ID	Rice_desc	Rice_Uniprot	Uniprot_desc	Uniprot_genename
Misin08G306300	0.0881048	-0.00511233	9.2238	0.0303599	(1 of 6) PTHR30620//PTHR30620:SF45 - PERIPLASMIC BETA-GLUCOSIDASE-RELATED // SUBFAMILY NOT NAMED	.-	AT1G78060	0	0	0	Q9SGZ5	Probable beta-D-xylosidase 7 (AtBXL7) (EC 3.2.1.-)	BXL7 At1g78060 F28K19.27 F28K19.32	LOC_Os02g51620	glycosyl hydrolase family 3 protein, putative, expressed	-	-	-
Misin01G063200	0.74883	0.107239	3.04416	1.59028	(1 of 2) PTHR11468//PTHR11468:SF8 - GLYCOGEN PHOSPHORYLASE // ALPHA-GLUCAN PHOSPHORYLASE 1	2.4.1.1	AT3G29320	0	alpha-glucan phosphorylase 1	Encodes a plastidic alpha-glucan phosphorylase. In vitro, the enzyme has a preference for maltooligosaccharides, such as maltoheptaose. The mRNA is cell-to-cell mobile.	Q9LIB2	Alpha-glucan phosphorylase 1 (AtPHS1) (EC 2.4.1.1) (Alpha-glucan phosphorylase, L isozyme) (Starch phosphorylase L)	PHS1 At3g29320 MUO10.17	LOC_Os03g55090	alpha-glucan phosphorylast isozyme, putative, expressed	Q10CK4	Alpha-1,4 glucan phosphorylase (EC 2.4.1.1)	LOC_Os03g55090
Misin07G485600	-0.108162	-0.000345156	0.194256	0.0705726	(1 of 5) 2.4.1.1 - Glycogen phosphorylase / Polyphosphorylase	2.4.1.1	-	-	-	-	-	-	-	-	-	-	-	-
Misin01G206300	0.0440951	0.0023745	10.3919	0.0274688	(1 of 3) PTHR13301:SF63 - CELLULOSE SYNTHASE A CATALYTIC SUBUNIT 4 [UDP-FORMING]	2.4.1.12	AT5G44030	CESA4	cellulose synthase A4	Encodes a cellulose synthase involved in secondary cell wall biosynthesis. Confers resistance towards bacterial and fungal pathogens, independent of salicylic acid, ethylene and jasmonate signaling. The mRNA is cell-to-cell mobile.	Q84JA6	Cellulose synthase A catalytic subunit 4 [UDP-forming] (AtCesA4) (EC 2.4.1.12) (Protein IRREGULAR XYLEM 5) (AtIRX5)	CESA4 IRX5 At5g44030 MRH10.14	LOC_Os10g32980	CESA7 - cellulose synthase, expressed	Q9AV71	Cellulose synthase A catalytic subunit 7 [UDP-forming] (EC 2.4.1.12) (OsCesA7)	CESA7 Os10g0467800 LOC_Os10g32980 OSJNBa0006L06.10
Misin02G190600	0.220398	0.0106556	6.31291	4.75316	(1 of 3) PTHR13301:SF63 - CELLULOSE SYNTHASE A CATALYTIC SUBUNIT 4 [UDP-FORMING]	2.4.1.12	AT5G44030	CESA4	cellulose synthase A4	Encodes a cellulose synthase involved in secondary cell wall biosynthesis. Confers resistance towards bacterial and fungal pathogens, independent of salicylic acid, ethylene and jasmonate signaling. The mRNA is cell-to-cell mobile.	Q84JA6	Cellulose synthase A catalytic subunit 4 [UDP-forming] (AtCesA4) (EC 2.4.1.12) (Protein IRREGULAR XYLEM 5) (AtIRX5)	CESA4 IRX5 At5g44030 MRH10.14	LOC_Os10g32980	CESA7 - cellulose synthase, expressed	Q9AV71	Cellulose synthase A catalytic subunit 7 [UDP-forming] (EC 2.4.1.12) (OsCesA7)	CESA7 Os10g0467800 LOC_Os10g32980 OSJNBa0006L06.10
Misin04G185900	0.0425774	0.00862332	10.4395	9.16631	(1 of 2) PTHR13301//PTHR13301:SF28 - X-BOX TRANSCRIPTION FACTOR-RELATED // SUBFAMILY NOT NAMED	2.4.1.12	AT5G17420	IRX3	IRREGULAR XYLEM 3	Encodes a xylem-specific cellulose synthase that is phosphorylated on one or more serine residues (on either S185 or one of S180 or S181). IRX3 is required for secondary cell wall biosynthesis.	Q9SWW6	Cellulose synthase A catalytic subunit 7 [UDP-forming] (AtCesA7) (EC 2.4.1.12) (Protein FRAGILE FIBER 5) (Protein IRREGULAR XYLEM 3) (AtIRX3)	CESA7 FRA5 IRX3 At5g17420 T10B6.80	LOC_Os09g25490	CESA9 - cellulose synthase, expressed	Q69P51	Cellulose synthase A catalytic subunit 9 [UDP-forming] (EC 2.4.1.12) (OsCesA9)	CESA9 Os09g0422500 LOC_Os09g25490 OJ1740_D06.31 OsJ_028258 P0418B08.2
Misin06G263100	0.0955008	0.0125564	5.23341	0.0231337	(1 of 2) PTHR13301//PTHR13301:SF31 - X-BOX TRANSCRIPTION FACTOR-RELATED // CELLULOSE SYNTHASE A CATALYTIC SUBUNIT 8 [UDP-FORMING]	2.4.1.12	AT4G18780	IRX1	IRREGULAR XYLEM 1	Encodes a member of the cellulose synthase family involved in secondary cell wall biosynthesis. Mutants have abnormal xylem formation, reduced cellulose content, and enhanced drought and osmotic stress tolerance. Mediates resistance towards bacterial pathogens via ABA. Confers resistance towards bacterial and fungal pathogens, independent of salicylic acid, ethylene and jasmonate signaling.	Q8LPK5	Cellulose synthase A catalytic subunit 8 [UDP-forming] (AtCesA8) (EC 2.4.1.12) (Protein IRREGULAR XYLEM 1) (AtIRX1) (Protein LEAF WILTING 2)	CESA8 IRX1 LEW2 At4g18780 F28A21.190	LOC_Os01g54620	CESA4 - cellulose synthase, expressed	Q5JN63	Cellulose synthase A catalytic subunit 4 [UDP-forming] (EC 2.4.1.12) (OsCesA4)	CESA4 Os01g0750300 LOC_Os01g54620 P0046E05.4
Misin03G174800	0.0664717	0.00292307	10.9718	0.0115882	(1 of 2) PTHR13301//PTHR13301:SF28 - X-BOX TRANSCRIPTION FACTOR-RELATED // SUBFAMILY NOT NAMED	2.4.1.12	AT5G17420	IRX3	IRREGULAR XYLEM 3	Encodes a xylem-specific cellulose synthase that is phosphorylated on one or more serine residues (on either S185 or one of S180 or S181). IRX3 is required for secondary cell wall biosynthesis.	Q9SWW6	Cellulose synthase A catalytic subunit 7 [UDP-forming] (AtCesA7) (EC 2.4.1.12) (Protein FRAGILE FIBER 5) (Protein IRREGULAR XYLEM 3) (AtIRX3)	CESA7 FRA5 IRX3 At5g17420 T10B6.80	LOC_Os09g25490	CESA9 - cellulose synthase, expressed	Q69P51	Cellulose synthase A catalytic subunit 9 [UDP-forming] (EC 2.4.1.12) (OsCesA9)	CESA9 Os09g0422500 LOC_Os09g25490 OJ1740_D06.31 OsJ_028258 P0418B08.2
Misin05G265800	0.300341	0.00980176	0.519271	1.68111	(1 of 2) PTHR13301//PTHR13301:SF31 - X-BOX TRANSCRIPTION FACTOR-RELATED // CELLULOSE SYNTHASE A CATALYTIC SUBUNIT 8 [UDP-FORMING]	2.4.1.12	AT4G18780	IRX1	IRREGULAR XYLEM 1	Encodes a member of the cellulose synthase family involved in secondary cell wall biosynthesis. Mutants have abnormal xylem formation, reduced cellulose content, and enhanced drought and osmotic stress tolerance. Mediates resistance towards bacterial pathogens via ABA. Confers resistance towards bacterial and fungal pathogens, independent of salicylic acid, ethylene and jasmonate signaling.	Q8LPK5	Cellulose synthase A catalytic subunit 8 [UDP-forming] (AtCesA8) (EC 2.4.1.12) (Protein IRREGULAR XYLEM 1) (AtIRX1) (Protein LEAF WILTING 2)	CESA8 IRX1 LEW2 At4g18780 F28A21.190	LOC_Os01g54620	CESA4 - cellulose synthase, expressed	Q5JN63	Cellulose synthase A catalytic subunit 4 [UDP-forming] (EC 2.4.1.12) (OsCesA4)	CESA4 Os01g0750300 LOC_Os01g54620 P0046E05.4
Misin01G358800	2.0784	1.79987	2.60974	2.21176	(1 of 2) PTHR12526:SF348 - SUCROSE SYNTHASE 2	2.4.1.13	AT4G02280	SUS3	sucrose synthase 3	Encodes a protein with sucrose synthase activity (SUS3). It appears to be important for sucrose metabolism in developing seeds, especially during the late maturation phase, about 18 days after flowering.	Q9M111	Sucrose synthase 3 (AtSUS3) (EC 2.4.1.13) (Sucrose-UDP glucosyltransferase 3)	SUS3 At4g02280 T2H3.8	LOC_Os03g22120	sucrose synthase, putative, expressed	Q10LP5	Sucrose synthase 4 (OsSUS4) (EC 2.4.1.13) (Sucrose-UDP glucosyltransferase 4)	SUS4 Os03g0340500 LOC_Os03g22120 OsJ_10783
Misin16G229500	1.12637	0.525421	1.29788	0.780365	(1 of 3) PTHR12526//PTHR12526:SF334 - GLYCOSYLTRANSFERASE // SUBFAMILY NOT NAMED	2.4.1.14	AT5G20280	SPS1F	sucrose phosphate synthase 1F	Encodes a protein with putative sucrose-phosphate synthase activity. When the gene was expressed in transgenic tobacco plants, a clear trend for increased SPS activity was noted.	Q94BT0	Sucrose-phosphate synthase 1 (EC 2.4.1.14) (Sucrose-phosphate synthase 1F) (AtSPS1F) (Sucrose-phosphate synthase 5.1) (AtSPS5.1) (UDP-glucose-fructose-phosphate glucosyltransferase)	SPS1 SPSA1 At5g20280 F5O24.170	LOC_Os08g20660	sucrose-phosphate synthase, putative, expressed	Q6ZHZ1	Probable sucrose-phosphate synthase 4 (EC 2.4.1.14) (Sucrose phosphate synthase 4F) (OsSPS4F) (UDP-glucose-fructose-phosphate glucosyltransferase)	SPS4 SPS8 Os08g0301500 LOC_Os08g20660 OJ1115_A07.105
Misin17G242300	0.596568	0.113495	1.11473	0.205311	(1 of 3) PTHR12526//PTHR12526:SF334 - GLYCOSYLTRANSFERASE // SUBFAMILY NOT NAMED	2.4.1.14	AT5G20280	SPS1F	sucrose phosphate synthase 1F	Encodes a protein with putative sucrose-phosphate synthase activity. When the gene was expressed in transgenic tobacco plants, a clear trend for increased SPS activity was noted.	Q94BT0	Sucrose-phosphate synthase 1 (EC 2.4.1.14) (Sucrose-phosphate synthase 1F) (AtSPS1F) (Sucrose-phosphate synthase 5.1) (AtSPS5.1) (UDP-glucose-fructose-phosphate glucosyltransferase)	SPS1 SPSA1 At5g20280 F5O24.170	LOC_Os08g20660	sucrose-phosphate synthase, putative, expressed	Q6ZHZ1	Probable sucrose-phosphate synthase 4 (EC 2.4.1.14) (Sucrose phosphate synthase 4F) (OsSPS4F) (UDP-glucose-fructose-phosphate glucosyltransferase)	SPS4 SPS8 Os08g0301500 LOC_Os08g20660 OJ1115_A07.105
Misin05G197100	1.81002	0.00256699	0.514902	0.541598	(1 of 2) PTHR10357:SF119 - 1,4-ALPHA-GLUCAN-BRANCHING ENZYME 3, CHLOROPLASTIC/AMYLOPLASTIC	2.4.1.18	AT3G20440	EMB2729	EMBRYO DEFECTIVE 2729	Encodes BE1, a putative glycoside hydrolase. Involved in organogenesis and somatic embryogenesis by regulating carbohydrate metabolism. Mutation in BE1 has pleotrophic effect on the whole plant development.	D2WL32	1,4-alpha-glucan-branching enzyme 3, chloroplastic/amyloplastic (AtSBE III) (EC 2.4.1.18) (Branching enzyme 1) (AtBE1) (Protein EMBRYO DEFECTIVE 2729) (Starch-branching enzyme 3)	SBE3 BE1 EMB2729 At3g20440 MQC12.20	LOC_Os06g26234	1,4-alpha-glucan-branching enzyme, putative, expressed	-	-	-
MisinT393000	1.45473	-0.0129144	2.17003	2.32223	(1 of 2) PTHR12526//PTHR12526:SF345 - GLYCOSYLTRANSFERASE // SUBFAMILY NOT NAMED	2.4.1.21	AT1G11720	SS3	starch synthase 3	Encodes a starch synthase that in addition to its role in starch biosynthesis also has a negative regulatory function in the biosynthesis of transient starch. The protein apparently contains a starch-binding domain (SBD).	F4IAG2	Starch synthase 3, chloroplastic/amyloplastic (AtSS3) (EC 2.4.1.21) (Soluble starch synthase III)	SS3 At1g11720 F25C20.13	-	-	-	-	-
Misin19G002300	11.9399	0.0105852	8.76657	9.31868	(1 of 2) K13679 - granule-bound starch synthase [EC:2.4.1.242] Glc a1-4 Glc (WAXY)	2.4.1.242	-	-	-	-	-	-	-	LOC_Os06g04200	starch synthase, putative, expressed	Q0DEV5	Granule-bound starch synthase 1, chloroplastic/amyloplastic (EC 2.4.1.242) (Granule-bound starch synthase I) (GBSS-I) (allergen Ory s GBSS_I)	WAXY WX WX-B Os06g0133000 LOC_Os06g04200 134P10.7 P0679C08.19
Misin06G219500	1.38933	0.0918322	0.973475	0.266255	(1 of 2) PTHR12741:SF14 - CALLOSE SYNTHASE 12	2.4.1.34	AT4G03550	GSL05	glucan synthase-like 5	Encodes a callose synthase that is required for wound and papillary callose formation in response to fungal pathogens Erysiphe and Blumeria. Mutants are resistant to P. parasitica and exhibit an exaggerated PR1 response.Contributes to PAMP-induced basal defense. The mRNA is cell-to-cell mobile.	Q9ZT82	Callose synthase 12 (EC 2.4.1.34) (1,3-beta-glucan synthase) (Protein GLUCAN SYNTHASE-LIKE 5) (Protein POWDERY MILDEW RESISTANT 4)	CALS12 GSL5 PMR4 At4g03550 F9H3.18 T5L23.4	LOC_Os01g55040	1,3-beta-glucan synthase component, putative, expressed	-	-	-
Misin05G037300	2.29866	0.301059	0.545354	0.212427	(1 of 2) PTHR19443//PTHR19443:SF17 - HEXOKINASE // SUBFAMILY NOT NAMED	2.7.1.1	-	-	-	-	-	-	-	LOC_Os01g09460	hexokinase, putative, expressed	Q1WM15	Hexokinase-8 (EC 2.7.1.1) (Hexokinase-4)	HXK8 HXK4 Os01g0190400 LOC_Os01g09460 P0710E05.19
MisinT434100	1.81359	0.149536	0.206155	0.479945	(1 of 2) PTHR19443//PTHR19443:SF6 - HEXOKINASE // HEXOKINASE-3-RELATED	2.7.1.1	AT1G50460	HKL1	hexokinase-like 1	Involved in glucose-ethylene crosstalk.	Q9LPS1	Hexokinase-3 (EC 2.7.1.1)	At1g50460 F11F12.18	LOC_Os01g71320	hexokinase, putative, expressed	Q2KNB4	Hexokinase-3 (EC 2.7.1.1) (Hexokinase-8)	HXK3 HXK8 Os01g0940100 LOC_Os01g71320 B1150F11.26-1
Misin18G152900	0.832931	0.124181	2.43534	1.29659	(1 of 2) 2.7.9.4 - Alpha-glucan, water dikinase / Starch-related R1 protein	2.7.9.4	AT1G10760	SEX1	STARCH EXCESS 1	Encodes an &#945;-glucan, water dikinase required for starch degradation. Involved in cold-induced freezing tolerance. Mutations that eliminate the GWD protein or affect the dikinase domain of the enzyme dramatically reduce both the amount of phosphate in the amylopectin and the rate of starch degradation. Mature leaves of these mutants accumulate amounts of starch up to seven times greater than …	Q9SAC6	Alpha-glucan water dikinase 1, chloroplastic (EC 2.7.9.4) (Protein starch excess 1) (Protein starch-related R1)	GWD1 R1 SEX1 At1g10760 F20B24.19 T16B5.10	LOC_Os06g30310	alpha-glucan water dikinase, chloroplast precursor, putative, expressed	-	-	-
Misin01G229200	1.532	0.294235	0.976262	0.243483	(1 of 4) PTHR31321//PTHR31321:SF12 - FAMILY NOT NAMED // PECTINESTERASE 31	3.1.1.11	AT3G29090	PME31	pectin methylesterase 31	Encodes an atypical pectin methylesterase that does not require salt for its activity and has a blockwise mode of pectin demethylesterification.	Q9LVQ0	Pectinesterase 31 (PE 31) (EC 3.1.1.11) (Pectin methylesterase 31) (AtPME31)	PME31 ARATH31 At3g29090 MXE2.5	LOC_Os10g26680	pectinesterase, putative, expressed	Q109P9	Pectinesterase family protein, expressed	LOC_Os10g26680
Misin12G163600	2.18822	0.964552	2.50621	1.29097	(1 of 2) PTHR30620:SF19 - BETA-D-XYLOSIDASE 6-RELATED	3.2.1.-	AT5G10560	0	0	0	Q9LXA8	Probable beta-D-xylosidase 6 (AtBXL6) (EC 3.2.1.-)	BXL6 At5g10560 F12B17.90	LOC_Os04g44840	glycosyl hydrolase family 3 protein, putative, expressed	-	-	-
MisinT282800	1.31294	0.152302	1.34586	1.05454	(1 of 2) 3.2.1.1//3.2.1.141 - Alpha-amylase / Glycogenase // 4-alpha-D-((1->4)-alpha-D-glucano)trehalose trehalohydrolase / Maltooligosyl trehalose trehalohydrolase	3.2.1.1	AT1G69830	AMY3	alpha-amylase-like 3	Encodes a plastid-localized &#945;-amylase. Expression is reduced in the SEX4 mutant. Loss of function mutations show normal diurnal pattern of starch accumulation/degradation. Expression follows circadian rhythms.	Q94A41	Alpha-amylase 3, chloroplastic (AtAMY3) (EC 3.2.1.1) (1,4-alpha-D-glucan glucanohydrolase)	AMY3 At1g69830 T17F3.14	LOC_Os01g51754	alpha-amylase precursor, putative, expressed	-	-	-
Misin01G486600	2.81155	0.0987632	2.49343	1.44129	(1 of 10) K01177 - beta-amylase (E3.2.1.2)	3.2.1.2	AT3G23920	BAM1	beta-amylase 1	Encodes a chloroplast beta-amylase. Is necessary for leaf starch breakdown in the absence of BAM3.Activity of BAM1 increases 4 days after osmotic stress. BAM1 has a higher temperature optimum than BAM3 (PMID:25293962).	Q9LIR6	Beta-amylase 1, chloroplastic (EC 3.2.1.2) (1,4-alpha-D-glucan maltohydrolase) (Beta-amylase 7) (Thioredoxin-regulated beta-amylase) (TR-BAMY)	BAM1 BMY7 TRBAMY At3g23920 F14O13.12	LOC_Os03g04770	beta-amylase, putative, expressed	Q10RZ1	Beta-amylase 2, chloroplastic (OsBamy2) (EC 3.2.1.2) (4-alpha-D-glucan maltohydrolase)	BAMY2 Os03g0141200 LOC_Os03g04770 OsJ_09355
Misin02G205400	4.4878	0.0802596	5.25841	4.53107	(1 of 10) K01177 - beta-amylase (E3.2.1.2)	3.2.1.2	AT3G23920	BAM1	beta-amylase 1	Encodes a chloroplast beta-amylase. Is necessary for leaf starch breakdown in the absence of BAM3.Activity of BAM1 increases 4 days after osmotic stress. BAM1 has a higher temperature optimum than BAM3 (PMID:25293962).	Q9LIR6	Beta-amylase 1, chloroplastic (EC 3.2.1.2) (1,4-alpha-D-glucan maltohydrolase) (Beta-amylase 7) (Thioredoxin-regulated beta-amylase) (TR-BAMY)	BAM1 BMY7 TRBAMY At3g23920 F14O13.12	LOC_Os10g32810	beta-amylase, putative, expressed	Q9AV88	Beta-amylase 1, chloroplastic (OsBamy1) (EC 3.2.1.2) (4-alpha-D-glucan maltohydrolase)	BAMY1 Os10g0465700 LOC_Os10g32810 OSJNBa0006L06.1
Misin02G483200	3.78136	0.0556596	5.10784	2.06668	(1 of 23) 3.2.1.2 - Beta-amylase / Saccharogen amylase	3.2.1.2	-	-	-	-	-	-	-	-	-	-	-	-
Misin03G201800	3.42445	0.0705665	5.68987	2.44119	(1 of 23) 3.2.1.2 - Beta-amylase / Saccharogen amylase	3.2.1.2	-	-	-	-	-	-	-	-	-	-	-	-
Misin15G034600	3.82981	0.0118334	4.66163	2.21874	(1 of 23) 3.2.1.2 - Beta-amylase / Saccharogen amylase	3.2.1.2	-	-	-	-	-	-	-	-	-	-	-	-
MisinT552400	8.88852	0.0372011	8.39877	3.76377	(1 of 10) K01177 - beta-amylase (E3.2.1.2)	3.2.1.2	AT3G23920	BAM1	beta-amylase 1	Encodes a chloroplast beta-amylase. Is necessary for leaf starch breakdown in the absence of BAM3.Activity of BAM1 increases 4 days after osmotic stress. BAM1 has a higher temperature optimum than BAM3 (PMID:25293962).	Q9LIR6	Beta-amylase 1, chloroplastic (EC 3.2.1.2) (1,4-alpha-D-glucan maltohydrolase) (Beta-amylase 7) (Thioredoxin-regulated beta-amylase) (TR-BAMY)	BAM1 BMY7 TRBAMY At3g23920 F14O13.12	LOC_Os10g32810	beta-amylase, putative, expressed	Q9AV88	Beta-amylase 1, chloroplastic (OsBamy1) (EC 3.2.1.2) (4-alpha-D-glucan maltohydrolase)	BAMY1 Os10g0465700 LOC_Os10g32810 OSJNBa0006L06.1
Misin19G146800	3.29382	0.0159287	5.16529	0.050086	(1 of 23) 3.2.1.2 - Beta-amylase / Saccharogen amylase	3.2.1.2	-	-	-	-	-	-	-	-	-	-	-	-
MisinT433500	3.6991	0.0408945	3.94776	0.0451187	(1 of 23) 3.2.1.2 - Beta-amylase / Saccharogen amylase	3.2.1.2	-	-	-	-	-	-	-	-	-	-	-	-
MisinT327000	0.0585967	0.00742162	7.84287	0.0108291	(1 of 23) 3.2.1.2 - Beta-amylase / Saccharogen amylase	3.2.1.2	-	-	-	-	-	-	-	-	-	-	-	-
Misin04G312400	-0.0982704	0.0482201	0.208172	1.77313	(1 of 23) 3.2.1.2 - Beta-amylase / Saccharogen amylase	3.2.1.2	-	-	-	-	-	-	-	-	-	-	-	-
Misin07G006200	-0.0324738	-0.00801351	0.438095	-0.000925953	(1 of 4) PF00251//PF08244//PF11837 - Glycosyl hydrolases family 32 N-terminal domain (Glyco_hydro_32N) // Glycosyl hydrolases family 32 C terminal (Glyco_hydro_32C) // Domain of unknown function (DUF3357) (DUF3357)	3.2.1.26	AT1G12240	ATBETAFRUCT4	0	Encodes a vacuolar invertase betaFruct4. betaFruct4 is transported from the endoplasmic reticulum through the intermediate compartments as a membrane protein. The N-terminal cytoplasmic domain contains multiple sequence motifs that are involved at various stages in the trafficking of betaFruct4 from the ER to the central vacuole. The mRNA is cell-to-cell mobile.	Q39041	Acid beta-fructofuranosidase 4, vacuolar (At beta fruct4) (AtBETAFRUCT4) (EC 3.2.1.26) (Acid invertase 4) (AI 4) (Acid sucrose hydrolase 4) (Vacuolar invertase 4) (Inv-V4) (VAC-INV 4) (VI 4)	BFRUCT4 BETAFRUCT4 At1g12240 T28K15.3	LOC_Os02g01590	glycosyl hydrolases, putative, expressed	-	-	-
Misin03G236400	1.26257	-0.0458943	3.51864	1.35371	(1 of 2) PTHR22298:SF57 - ENDOGLUCANASE 10-RELATED	3.2.1.4	AT1G19940	GH9B5	glycosyl hydrolase 9B5	0	Q9FXI9	Endoglucanase 2 (EC 3.2.1.4) (Endo-1,4-beta glucanase 2)	At1g19940 F6F9.1 T20H2.27	LOC_Os09g36350	endoglucanase, putative, expressed	Q69SG5	Endoglucanase 24 (EC 3.2.1.4) (Endo-1,4-beta glucanase 24)	Os09g0533900 LOC_Os09g36350 OJ1112_E07.17-1
Misin04G215400	0.652709	-0.0234945	0.989236	0.160043	(1 of 3) K01214 - isoamylase (E3.2.1.68)	3.2.1.68	AT4G09020	ISA3	isoamylase 3	Encodes an isoamylase-like protein. Mutant studies show that the gene is strongly involved in starch breakdown. A GUS-protein fusion product was shown to localize to the surface of chloroplastic structures reminiscent of starch granules. In the mutants, the chloroplastic &#945;-amylase AMY3 is upregulated. The mRNA is cell-to-cell mobile.	Q9M0S5	Isoamylase 3, chloroplastic (AtISA3) (EC 3.2.1.68)	ISA3 At4g09020 F23J3.50	LOC_Os09g29404	glycogen operon protein glgX, putative, expressed	B9G434	Isoamylase 3, chloroplastic (OsISA3) (EC 3.2.1.68)	ISA3 Os09g0469400 LOC_Os09g29404 OJ1595_D08.13-1 OsJ_29702 P0676H02.31-1
Misin16G125400	0.779066	0.0837792	0.507783	0.954417	(1 of 3) PTHR10366//PTHR10366:SF379 - NAD DEPENDENT EPIMERASE/DEHYDRATASE // SUBFAMILY NOT NAMED	4.1.1.35	AT2G47650	UXS4	UDP-xylose synthase 4	encodes a protein similar to UDP-glucuronic acid decarboxylase. UDP-glucuronic acid decarboxylase produces UDP-xylose, which is a substrate for many cell wall carbohydrates including hemicellulose and pectin. UDP-xylose is also known to feedback regulate several cell wall biosynthetic enzymes.	Q8S8T4	UDP-glucuronic acid decarboxylase 4 (EC 4.1.1.35) (UDP-XYL synthase 4) (UDP-glucuronate decarboxylase 4) (UGD) (UXS-4)	UXS4 At2g47650 T30B22.31	LOC_Os05g29990	NAD dependent epimerase/dehydratase family domain containing protein, expressed	-	-	-
Misin07G215000	2.00586	0.195332	1.8721	1.70977	(1 of 3) PTHR10357:SF110 - PROTEIN T04A8.7, ISOFORM A		-	-	-	-	-	-	-	-	-	-	-	-
Misin02G324200	12.5588	1.17593	3.69997	0.0448739	(1 of 2) PTHR10788//PTHR10788:SF43 - TREHALOSE-6-PHOSPHATE SYNTHASE // SUBFAMILY NOT NAMED		-	-	-	-	-	-	-	LOC_Os03g26910	uncharacterized glycosyl hydrolase Rv2006/MT2062, putative, expressed	Q10KF5	Probable trehalose-phosphate phosphatase 9 (OsTPP9) (EC 3.1.3.12) (Trehalose 6-phosphate phosphatase)	TPP9 Os03g0386500 LOC_Os03g26910 OsJ_11091 OSJNBb0058G04.17
Misin04G012800	5.88664	-0.00028041	9.87479	0.00939607	(1 of 2) PTHR11374//PTHR11374:SF27 - UDP-GLUCOSE DEHYDROGENASE/UDP-MANNAC DEHYDROGENASE // SUBFAMILY NOT NAMED		-	-	-	-	-	-	-	-	-	-	-	-
Misin02G500700	0.540482	0.550505	1.64496	0.715434	(1 of 2) PTHR12741:SF21 - CALLOSE SYNTHASE 3		-	-	-	-	-	-	-	LOC_Os03g03610	1,3-beta-glucan synthase component domain containing protein, expressed	Q8S5U9	1,3-beta-glucan synthase component family protein, expressed	LOC_Os03g03610
Misin01G499800	0.670232	0.22895	1.29144	0.353313	(1 of 2) PTHR12741:SF21 - CALLOSE SYNTHASE 3		-	-	-	-	-	-	-	-	-	-	-	-
Misin07G499000	0.614176	0.0304992	1.19664	0.215473	(1 of 2) PTHR13271//PTHR13271:SF44 - UNCHARACTERIZED PUTATIVE METHYLTRANSFERASE // RIBULOSE-1,5-BISPHOSPHATE CARBOXYLASE/OXYGENASE SMALL SUBUNIT N-METHYLTRANSFERASE I-RELATED		AT3G07670	0	0	0	Q9S7D2	Putative ribulose-1,5-bisphosphate carboxylase/oxygenase small subunit N-methyltransferase I (Rubisco methyltransferase family protein)	F17A17.1 MLP3.12 At3g07670	LOC_Os02g49326	SET domain-containing protein, putative, expressed	-	-	-
Misin15G074500	0.330966	0.180947	1.3199	0.15328	(1 of 464) PF00076 - RNA recognition motif. (a.k.a. RRM, RBD, or RNP domain) (RRM_1)		AT3G20930	0	0	Encodes a unique protein that is both a member of the RIP (RNA-editing interacting protein) family and the RNA recognition motif (RRM)-containing family. It controls the editing extent of 62% of the plastid Cs targeted for editing in Arabidopsis.	Q8L440	Organelle RRM domain-containing protein 1, chloroplastic	ORRM1 At3g20930 MFD22.4	-	-	-	-	-
MisinT548100	0.452935	0.181694	1.0291	0.299675	(1 of 2) PTHR13271//PTHR13271:SF44 - UNCHARACTERIZED PUTATIVE METHYLTRANSFERASE // RIBULOSE-1,5-BISPHOSPHATE CARBOXYLASE/OXYGENASE SMALL SUBUNIT N-METHYLTRANSFERASE I-RELATED		AT3G07670	0	0	0	Q9S7D2	Putative ribulose-1,5-bisphosphate carboxylase/oxygenase small subunit N-methyltransferase I (Rubisco methyltransferase family protein)	F17A17.1 MLP3.12 At3g07670	LOC_Os02g49326	SET domain-containing protein, putative, expressed	-	-	-
Misin18G276400	1.65976	0.00394196	1.00925	1.5824	(1 of 3) PTHR10357:SF110 - PROTEIN T04A8.7, ISOFORM A		-	-	-	-	-	-	-	-	-	-	-	-
Misin01G503500	7.32993	-0.00365351	0.04001	0.0112471	(1 of 2) PTHR31339:SF12 - POLYGALACTURONASE-LIKE PROTEIN		AT2G23900	0	0	0	Q1PF10	Glycoside hydrolase family 28 protein/polygalacturonase family protein (Pectin lyase-like superfamily protein)	At2g23900 T29E15.10 T29E15_10	LOC_Os03g03350	polygalacturonase, putative, expressed	Q10SE9	Os03g0124900 protein (Polygalacturonase, putative, expressed)	LOC_Os03g03350 Os03g0124900 OSNPB_030124900
Misin04G317100	0.0328979	-0.00409383	0.0716401	-0.0226694	(1 of 5) PTHR13301//PTHR13301:SF44 - X-BOX TRANSCRIPTION FACTOR-RELATED // SUBFAMILY NOT NAMED		-	-	-	-	-	-	-	LOC_Os07g36750	CSLF3 - cellulose synthase-like family F; beta1,3;1,4 glucan synthase, expressed	Q6ZF85	Probable mixed-linked glucan synthase 3 (EC 2.4.1.-) (1,3;1,4-beta-D-glucan synthase 3) (Cellulose synthase-like protein F3) (OsCslF3)	CSLF3 Os07g0553400 LOC_Os07g36750 OsJ_023724 P0013G11.12
Misin05G336600	1.06422	0.0637841	0.246469	0.106312	(1 of 2) PTHR10584:SF175 - FRUCTOKINASE-LIKE 1		AT3G54090	FLN1	fructokinase-like 1	Encodes a fructokinase-like protein (AT3G54090/FLN1, AT1G69200/FLN2), a member of the pfkB-carbohydrate kinase family. FLN1 and FLN2 are potential plastidial thioredoxin z (TRX z) targets. Mutants display mutant chloroplast development, general plant growth and development defects and defects in PEP-dependent transcription.	Q9M394	Fructokinase-like 1, chloroplastic (PEP-associated protein 6) (pfkB-type carbohydrate kinase family protein 2)	FLN1 PAP6 PFKB2 At3g54090 F24B22.50	LOC_Os01g63220	kinase, pfkB family, putative, expressed	-	-	-
Misin06G334200	1.71484	0.09781	0.19918	0.0481912	(1 of 2) PTHR10584:SF175 - FRUCTOKINASE-LIKE 1		AT3G54090	FLN1	fructokinase-like 1	Encodes a fructokinase-like protein (AT3G54090/FLN1, AT1G69200/FLN2), a member of the pfkB-carbohydrate kinase family. FLN1 and FLN2 are potential plastidial thioredoxin z (TRX z) targets. Mutants display mutant chloroplast development, general plant growth and development defects and defects in PEP-dependent transcription.	Q9M394	Fructokinase-like 1, chloroplastic (PEP-associated protein 6) (pfkB-type carbohydrate kinase family protein 2)	FLN1 PAP6 PFKB2 At3g54090 F24B22.50	LOC_Os01g63220	kinase, pfkB family, putative, expressed	-	-	-
Misin01G020200	0.480576	1.40115	2.16447	1.08525	(1 of 36) PF12708 - Pectate lyase superfamily protein (Pectate_lyase_3)		AT3G62110	0	0	0	Q9FPJ2	AT3g62110 (Pectin lyase-like superfamily protein)	At3g62110 At3g62110/T17J13_70	LOC_Os03g61800	polygalacturonase, putative, expressed	Q10B12	Glycoside hydrolase family 28 protein, putative, expressed	LOC_Os03g61800
Misin10G043000	0.12159	0.00348403	-0.00765514	1.01878	(1 of 3) PTHR12526//PTHR12526:SF334 - GLYCOSYLTRANSFERASE // SUBFAMILY NOT NAMED		-	-	-	-	-	-	-	-	-	-	-	-
MisinT018600	-0.20421	-0.00548674	0.405394	2.79772	(1 of 4) PTHR12741//PTHR12741:SF17 - LYST-INTERACTING PROTEIN LIP5 DOPAMINE RESPONSIVE PROTEIN DRG-1 // SUBFAMILY NOT NAMED		-	-	-	-	-	-	-	-	-	-	-	-
MisinT481700	0.0849209	-0.000774911	0.350832	4.82485	(1 of 36) PF12708 - Pectate lyase superfamily protein (Pectate_lyase_3)		AT1G19170	0	0	0	F4IE17	Pectin lyase-like superfamily protein	At1g19170 T29M8.4 T29M8_4	-	-	-	-	-
